# Supplementary material for: Procollagen-lysine 2-oxoglutarate 5-dioxygenase 2 promotes hypoxia-induced glioma migration and invasion
Source: PubMed Central journal article supplement (PMC5410313; doi:10.18632/oncotarget.15581), 2017-02-21
Supplement: oncotarget-08-23401-s001.pdf [file oncotarget-08-23401-s001.pdf]

## Procollagen-lysine 2-oxoglutarate 5-dioxygenase 2 promotes hypoxia-induced glioma migration and invasion

### Supplementary Materials

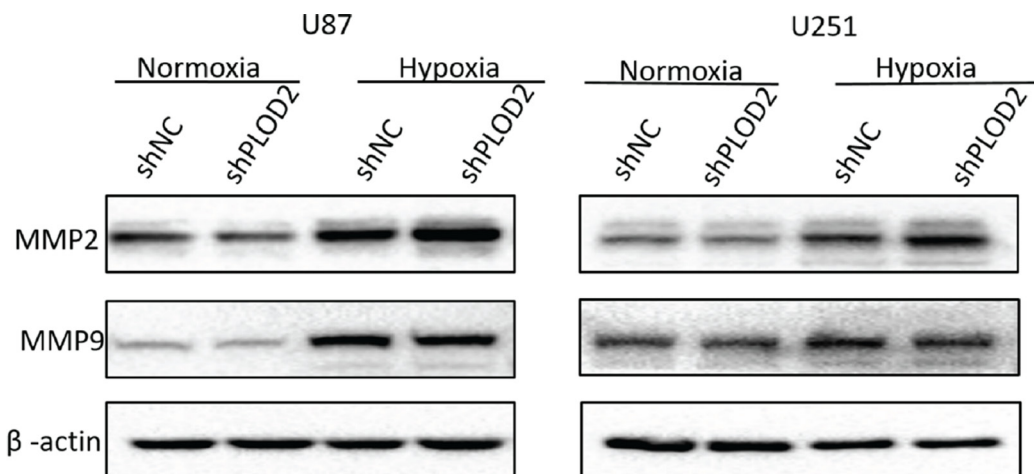

**Supplementary Figure 1: PLOD2 does not regulate MMP2 and MMP9 protein levels.** Western blot analysis of MMP2 and MMP9 in U87 and U251 cells infected with shPLOD2 or shNC lentivirus under normoxic or hypoxic conditions as indicated.

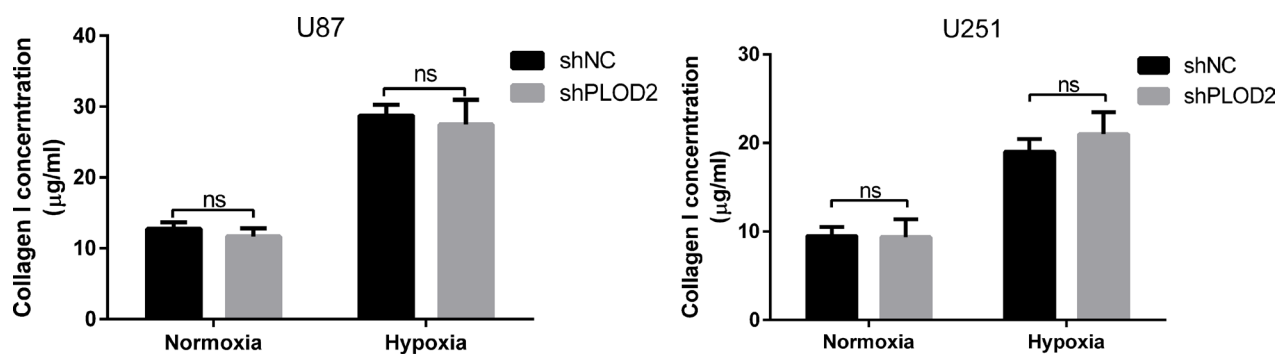

**Supplementary Figure 2: Knockdown of PLOD2 does not lead to a decrease in collagen levels in U87 or U251 cells.** ELISA used to measure collagen I concentrations (μg/mL) in conditioned media from U87-shNC and U87-shPLOD2 or U251-shNC and U251-shPLOD2 under normoxic or hypoxic conditions for 48 h. Data are presented as the mean ± SD (3 individual experiments); ns, not significant; versus shNC group under the indicated condition.
